# Supplementary material for: Phase transitions in few-monolayer spin ice films
Source: PubMed Central journal article supplement (PMC6418252; doi:10.1038/s41467-019-09187-w), 2019-03-14
Supplement: 41467_2019_9187_MOESM1_ESM.pdf [file 41467_2019_9187_MOESM1_ESM.pdf]

**Supplementary Information for**

**“Phase Transitions in Few-Monolayer Spin Ice Films”**

Bovo et al.

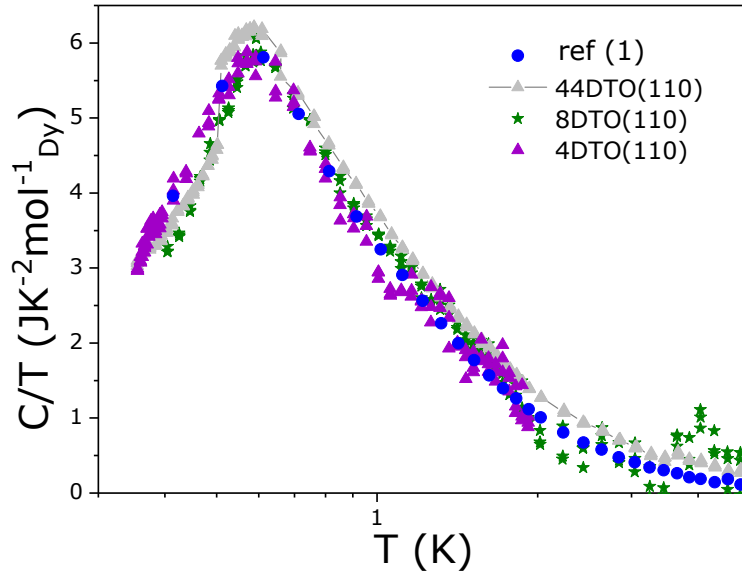

**Supplementary Figure 1. Specific Heat for  $x$ DTO||YTO(110) series.** Colour code, as explained in the legend. Specific heat contribution scales with sample thickness, although the sharp but small discontinuity at  $T = 0.510(2)$ K visible in  $x = 44$  (grey triangle, with line as guide to the eye) is lost for  $x = 8$  (green stars) and 4 (purple triangle). Our previous result (1) is reported for comparisons; data are in excellent agreement although the old ones (blue circles) fail to detect the discontinuity due to a wider spacing of points.

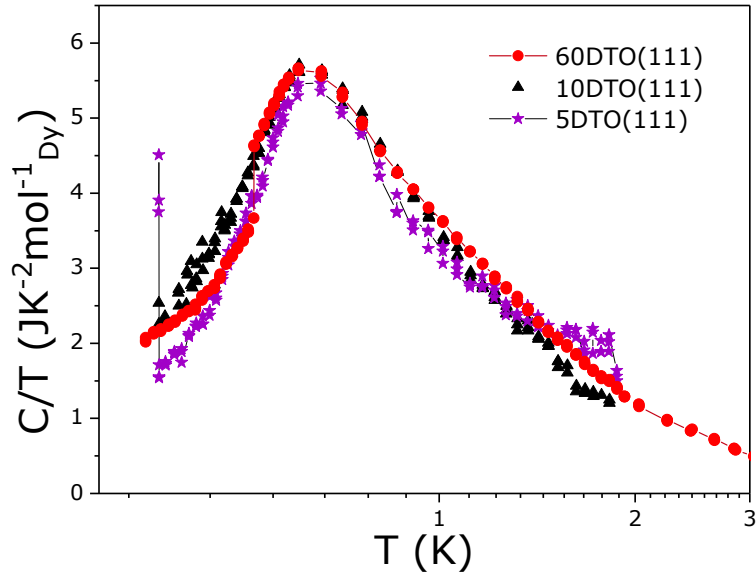

**Supplementary Figure 2. Specific Heat for  $x$ DTO||YTO(111) series.** Colour code, as explained in the legend. Specific heat contribution scales with sample thickness, although the sharp but small discontinuity at  $T = 0.520(2)$ K visible in  $x = 60$  (red circles, with line as guide to the eye) is lost for  $x = 10$  (black triangle) and 5 (purple stars, with line as guide to the eye). The thinnest sample,  $x = 5$ , also shows the hint of a sharp rise at very low temperature.

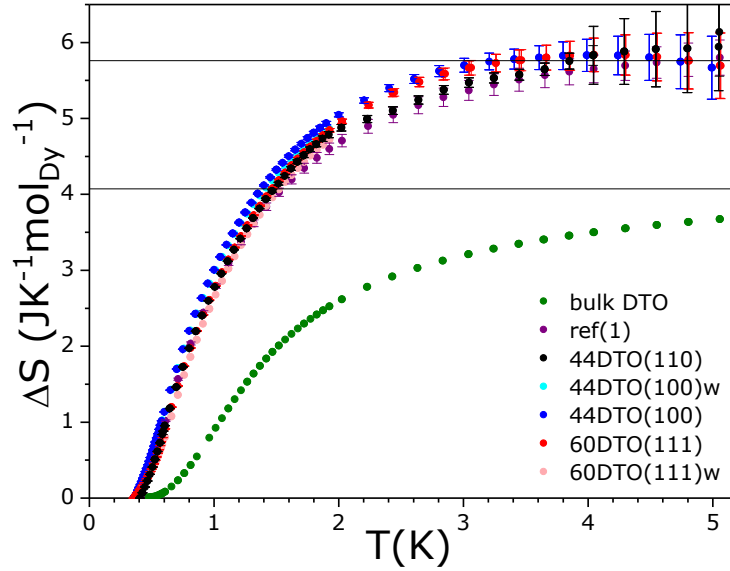

**Supplementary Figure 3. Magnetic Entropy curves for DTO||YTO samples.** Colour code, as explained in the legend. Magnetic entropy increment found by integrating  $c/T$  between 0.35K and 5K for samples reported in the legend. Error bars represent estimated maximum systematic error. Top line corresponds to the expected value for the full spin entropy of  $R(\ln 2)$ . The bottom line corresponds to the expected value for a spin ice compound of  $R(\ln 2 - (1/2) \ln(3/2))$ , where the right-hand term is the Pauling residual entropy.

### **Supplementary Reference**

(1) L. Bovo et al., Restoration of The Third Law in Spin Ice Thin Films. *Nature Comms.* **5**, 3439 (2014).
